## RESEARCH ARTICLE

The chloroplast genome sequence and phylogenetic analysis of *Apocynum venetum* L.Xiaonong Guo<sup>1,2,3\*</sup>, Zhuangxia Wang<sup>1,2,3</sup>, Deyu Cai<sup>1,2,3</sup>, Lei Song<sup>1</sup>, Jialin Bai<sup>1,2,3</sup>

**1** Key Laboratory of Biotechnology and Bioengineering of State Ethnic Affairs Commission, Biomedical Research Center, Northwest Minzu University, Lanzhou, China, **2** College of Life Science and Engineering, Northwest Minzu University, Lanzhou, China, **3** China-Malaysia National Joint Laboratory, Biomedical Research Center, Northwest Minzu University, Lanzhou, China

\* [gxnwww@xbmu.edu.cn](mailto:gxnwww@xbmu.edu.cn)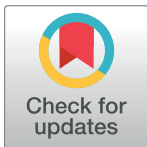

## Abstract

*Apocynum venetum* L. (*Apocynaceae*) is valuable for its medicinal compounds and fiber content. Native *A. venetum* populations are threatened and require protection. Wild *A. venetum* resources are limited relative to market demand and a poor understanding of the composition of *A. venetum* at the molecular level. The chloroplast genome contains genetic markers for phylogenetic analysis, genetic diversity evaluation, and molecular identification. In this study, the entire genome of the *A. venetum* chloroplast was sequenced and analyzed. The *A. venetum* cp genome is 150,878 bp, with a pair of inverted repeat regions (IRA and IRB). Each inverted repeat region is 25,810 bp, which consist of large (LSC, 81,951 bp) and small (SSC, 17,307 bp) single copy areas. The genome-wide GC content was 38.35%, LSC made up 36.49%, SSC made up 32.41%, and IR made up 43.3%. The *A. venetum* chloroplast genome encodes 131 genes, including 86 protein-coding genes, eight ribosomal RNA genes, and 37 transfer RNA genes. This study identified the unique characteristics of the *A. venetum* chloroplast genome, which will help formulate effective conservation and management strategies as well as molecular identification approaches for this important medicinal plant.

## OPEN ACCESS

**Citation:** Guo X, Wang Z, Cai D, Song L, Bai J (2022) The chloroplast genome sequence and phylogenetic analysis of *Apocynum venetum* L. PLoS ONE 17(3): e0261710. <https://doi.org/10.1371/journal.pone.0261710>

**Editor:** Maoteng Li, Huazhong University of Science and Technology, CHINA

**Received:** June 27, 2021

**Accepted:** December 8, 2021

**Published:** March 10, 2022

**Peer Review History:** PLOS recognizes the benefits of transparency in the peer review process; therefore, we enable the publication of all of the content of peer review and author responses alongside final, published articles. The editorial history of this article is available here: <https://doi.org/10.1371/journal.pone.0261710>

**Copyright:** © 2022 Guo et al. This is an open access article distributed under the terms of the [Creative Commons Attribution License](https://creativecommons.org/licenses/by/4.0/), which permits unrestricted use, distribution, and reproduction in any medium, provided the original author and source are credited.

**Data Availability Statement:** All relevant data are within the paper and its [Supporting information files](#).

**Funding:** The National Natural Science Foundation of China (Grant No. 31760242), Gansu Provincial

## Introduction

*Apocynum venetum* L. (*Apocynaceae*) (Luobuma in Chinese) is a perennial herb distributed in Eurasia from Southeast Europe to Northern China. It occurs in floodplains and valleys along rivers such as the Tarim River [1, 2]. The roots, stems, leaves, and flowers of *A. venetum* have medicinal uses [3, 4] and these uses were documented in the “Compendium of Materia Medica.” In 1977, *A. venetum* was listed in the Pharmacopoeia of the People’s Republic of China as a primary treatment for hypertension and hyperlipidemia [5–8], and pharmacological studies have demonstrated that *A. venetum* possesses many pharmacological activities including cardiotoxic [9], hepatoprotective [10, 11], antioxidant [12–14], antidepressant and anxiolytic effects [15–18]. *A. venetum* maybe useful for the prevention and treatment of cardiovascular and neurological diseases such as high blood pressure, high cholesterol, neurasthenia, depression, and anxiety [19–23].

Natural Science Foundation (Grant No. 20JR10RA120), Gansu Provincial Natural Science Foundation the Ministry of Education of China for an Innovative Research Team in University (IRT 17R88), and the Fundamental Research Funds for the Central Universities (Grant No. 31920190021) The funders had no role in study design, data collection and analysis, decision to publish, or preparation of the manuscript.

**Competing interests:** The authors have declared that no competing interests exist.

*A. venetum* has relatively high salt tolerance, cold tolerance, drought tolerance, high temperature tolerance, and wind resistance [24, 25]. It is an important plant for the wind proofing and sand-stabilization of desert grasslands in Central Asia. *A. venetum* therefore combines ecological benefits and economic benefits [24, 26]. Overharvesting of wild *A. venetum* and environmental degradation have reduced *Apocynum* populations and protection of *Apocynum* germplasm resources is needed. Studies of *A. venetum* have mainly focused on its medicinal effects and physiological characteristics such as photosynthesis and water absorption [27, 28]. However, there are few studies on the genetic diversity and genetic structure of wild *A. venetum* populations [29, 30].

Chloroplasts (cps) are the descendants of ancient bacteria endosymbionts. They are important organelles in plant cells that are responsible for photosynthesis and other aspects of metabolism [31]. Cp DNA is independent of the nuclear genome and exhibits semi-autonomous genetic characteristics. The characteristics of maternal and highly conserved genes in the cp genome are favorable for studying plant phylogeny [32, 33]. Molecular barcodes based on the cp genome have potential for species identification, especially among closely related taxa [34, 35]. The complete cp genome sequence may provide reliable barcodes for accurate plant identification at species and population levels [36, 37]. In higher plants, photosynthesis occurs in cp, which provides the necessary energy for plant growth and survival.

There are many counterfeit *A. venetum* products on the market, and they are difficult to detect based on appearance. There is a need for a molecular method to distinguish counterfeit products. DNA barcode sequence analysis is a molecular identification technology that uses standardized DNA sequence fragments to provide a fast, accurate, and automated species identification method [38–41]. The non-coding region of the cp has been successfully used in research on the DNA barcode. *A. venetum* cp genome information can provide candidate DNA barcodes for the identification of *A. venetum* and counterfeit products.

In this study, we assembled and analyzed the *A. venetum* cp genome sequence based on Illumina paired-end (PE) sequencing data. Through bioinformatics analysis, the sequence was compared with other known cp genome sequences. The information helped us determine the phylogeny of this species.

## Materials and methods

### Sampling, DNA extraction, sequencing, and assembly

*A. venetum* seeds were collected from wild plants in Shaya County in the Xinjiang Uygur Autonomous Region, China (40° 92' N, 82° 21' E; 957 m). After removal of the bracts, seeds were surface sterilized for 1 min in 75% ethanol (v/v), rinsed three times with distilled water, and then germinated at 25°C in the dark on filter paper dampened with distilled water. When the plumule emerged, uniform seedlings were transplanted into plugged holes in plastic containers (5 cm × 5 cm × 5 cm, 1 seedling/container) filled with vermiculite and watered with modified Hoagland nutrient solution containing 2 mM KNO<sub>3</sub>, 0.5 mM NH<sub>4</sub>H<sub>2</sub>PO<sub>4</sub>, 0.25 mM MgSO<sub>4</sub>·7H<sub>2</sub>O, 0.1 mM Ca(NO<sub>3</sub>)<sub>2</sub>·4H<sub>2</sub>O, 50 μM Fe-citrate, 92 μM H<sub>3</sub>BO<sub>3</sub>, 18 μM MnCl<sub>2</sub>·4H<sub>2</sub>O, 1.6 μM ZnSO<sub>4</sub>·7H<sub>2</sub>O, 0.6 μM CuSO<sub>4</sub>·5H<sub>2</sub>O and 0.7 μM (NH<sub>4</sub>)<sub>6</sub>Mo<sub>7</sub>O<sub>24</sub>·4H<sub>2</sub>O. Solutions were renewed every 3 d. Seedlings were grown in a greenhouse at a temperature of 28°C/23°C (day/night) and photoperiod of 16:8 h (light:dark). The flux density was approximately 800 μmol m<sup>-2</sup> s<sup>-1</sup>) and the relative humidity was 65%. Fresh leaves were collected on October 18, 2019, frozen in liquid nitrogen and then stored at -80°C until analysis [42].

Genomic DNA was isolated by the modified CTAB method. Agarose gel electrophoresis and a one drop spectrophotometer (OD-1000, Shanghai, China) were used to detect DNA integrity and quality. One library (250 bp) was constructed using pure DNA according to the

manufacturer's instructions (NEBNext<sup>®</sup> UltraTM DNA Library Prep Kit for Illumina<sup>®</sup>). The library was constructed with an Illumina NovaSeq platform (Benagen Tech Solution Co. Ltd., Wuhan, China) and 150-bp paired-end reads were generated. The Illumina PCR adapter reads, low-quality reads and reads containing more than 5% unknown nucleotides "Ns" were filtered from the paired-end raw reads in the quality control step. All good-quality paired clean reads were obtained using SOAPnuke software (version: 1.3.0). The assembled reads were joined into a bidirectional iterative derivation using NOVOPlasty (version:3.13.1, parameter: k-mer = 127) to obtain the whole-genome sequence. The cp-like reads were used to assemble sequences using NOVOPlasty. NOVOPlasty assembled the partial reads and stretched as far as possible until a circular genome was formed. All circled sequences were searched by BLASTN (version: BLAST 2.2.30+, E-value  $\leq 1e^{-5}$ ) against the reference database. Sequences with alignment greater than 1,000 bp and coverage greater than 90% were retained. Based on the depth of sequencing, PE reads alignment, and alignment with closely species to *A. venetum*, the candidate sequences were connected in order to determine whether they formed a loop. When a gap (including N sequence) appeared, Gapcloser (Version: 1.12) was used to fill in the hole to obtain the final splicing result [43]. After filtering the repeated sequences and the sequences with lengths less than 300 bp, 48 sequences with start codons of ATG, TTG, CTG, ATT, ATC, GTG, and ATA and end codons of TGA, TAG, and TAA, were retained to conduct subsequent analysis.

### Annotation and analysis of the cpDNA sequences

The cp genome sequence was annotated using the DOGMA program (<http://dogma.cccb.utexas.edu/>) [44], and the tRNAscan-SE program was used to predict tRNAs in the genome [45]. The circular maps were drawn by the OGDRAWv1.2 program [46] (<http://ogdraw.mpimp-golm.mpg.de/>). In order to eliminate the influence of amino acid composition on codon usage, the characteristics of the variations in synonymous codon usage, the relative synonymous codon usage values (RSCU), base composition and codon content were analyzed using MEGA 7.0. Simple sequence repeats (SSRs) in the cp genome were identified using SSRHunter software (<http://www.biosoft.net>) [47, 48]. The parameters were set to five repeat units for mononucleotide SSRs, five repeat units for dinucleotide SSRs, three repeat units for trinucleotide SSRs, and three repeat units each for tetranucleotides, and pentanucleotide SSRs.

### Genome comparison

The pairwise alignments of cp genomes was conducted by MUMmer [42]. The mVISTA software was used to compare the *A. venetum* cp genome with three other cp genomes. *Nicotiana attenuata*, *Gossypium hirsutum*, and *Arabidopsis thaliana* (NC\_035952.1, DQ345959, and NC\_000932.1, respectively) using the annotation of *Sophora japonica* L. as reference [44, 45]. We determined the repeat structure, including forward and reverse repeats, using the REPuter software [46–49].

### Phylogenetic analysis

We downloaded 21 cp genome sequences from the NCBI organelle genome and nucleotide resource database, and used all genomes for phylogenetic analysis. Clustalw2 software (Conway Institute of Biomolecular and Biomedicine, Dublin, Ireland) was used to sequence the genome [50–53]. We used MEGA7.0 to analyze and draw a phylogenetic tree with ML (maximum likelihood). Bootstrap analysis was performed using 1,000 repetitions and TBR branch exchanges [54–56]. We used 1,000 replicates and TBR branch exchanges to complete the bootstrap analysis.

## Results

### Features of *A. venetum* cpDNA

The complete cp genome of *A. venetum* is 150,878 bp in length (GenBank accession number: MT568765) (Fig 1), and includes a pair of inverted repeats (IR) 25,810 bp long, separated by a large single region (LSC) and a small copy region (SSC) of 81,951 bp and 17,307 bp, respectively (Table 1). It is similar to the cp genome of other *Apocynaceae* species [57]

In the *A. venetum* cp genome, 131 functional genes were predicted, including eight rRNA genes, 37 tRNA genes, and 86 protein-coding genes (Table 2) Cp genomes in the IR regions include 33 duplicated genes, with approximately 15 tRNA genes (tRNAs), eight rRNA genes (rRNAs), and nine protein-coding genes (PCGs) (Fig 1). The LSC region includes 58 protein-

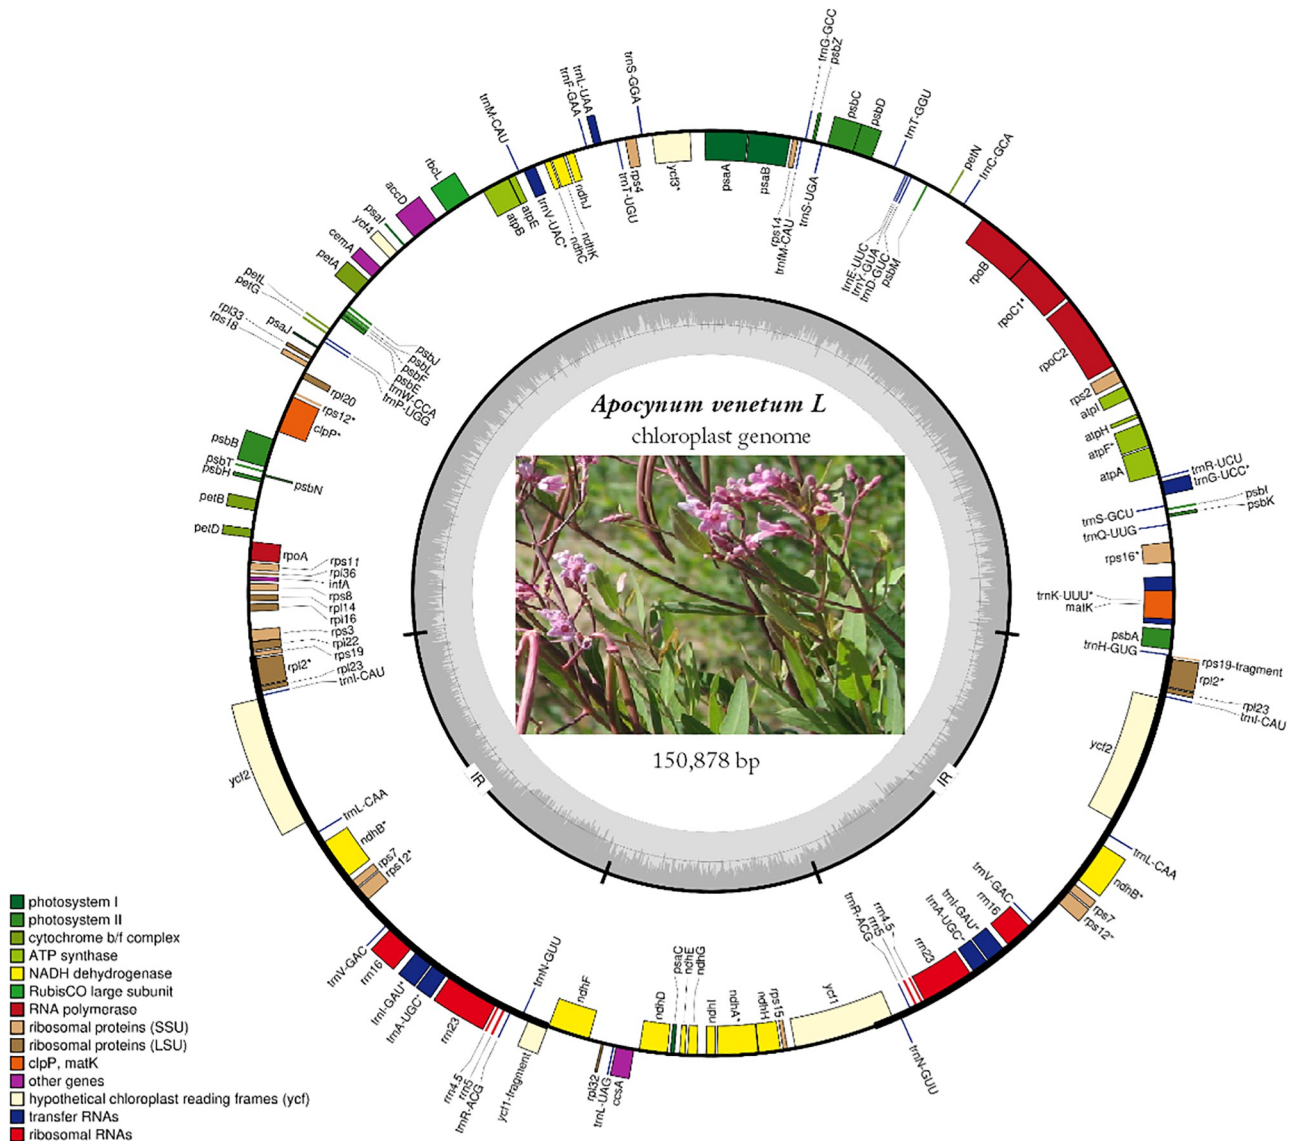

**Fig 1. Map of *A. venetum* cpgenome.** Thick lines indicate the extent of the inverted repeat regions (Ira and Irb), which separate the genome into small (SSC) and large (LSC) single copy regions. Genes drawn inside the circle are transcribed clockwise, and those outside are transcribed counterclockwise. Different colors represent different functional groups of genes.

<https://doi.org/10.1371/journal.pone.0261710.g001>

**Table 1. Base composition in the *A. venetum* chloroplast genome.**

| Region       | Length | A (%) | T (%) | C (%) | G (%) | AT (%) | GC (%) |
|--------------|--------|-------|-------|-------|-------|--------|--------|
| Total genome | 150878 | 30.43 | 31.21 | 19.52 | 18.83 | 61.64  | 38.35  |
| LSC          | 81951  | 31.02 | 32.49 | 18.69 | 17.8  | 63.51  | 36.49  |
| IRA          | 25810  | 28.59 | 28.11 | 20.84 | 22.46 | 56.7   | 43.3   |
| SSC          | 17307  | 33.85 | 33.65 | 17.09 | 15.32 | 67.49  | 32.41  |
| IRB          | 25810  | 28.11 | 28.59 | 22.46 | 20.84 | 56.7   | 43.3   |

<https://doi.org/10.1371/journal.pone.0261710.t001>

coding and 22 tRNA genes, while the SSC region includes one tRNA gene and 11 protein-coding genes.

The tRNA and protein-encoding gene sequences of the *A. venetum* cp were analyzed, and the codon usage frequency of the cp genome of *A. venetum* was inferred and summarized. A total of 17,318 codons represent the coding ability of 86 protein-coding genes and tRNA genes of *A. venetum* (Table 4), of which 1,814 codons code for leucine (10.47%), and 319 codons code for tryptophan (1.84%), which are the most common and least common amino acids in the cp genome of *A. venetum*, respectively. Codons ending in A and U are very common. Except for trtI-*caa*, all preferred synonymous codons (RSCU > 1) end in A or U. There are 14 intron-containing genes, including nine protein-coding genes and five tRNA genes (Table 3). Twelve genes (seven protein-coding and five tRNA genes) contain an intron, and two genes (*ycf3* and *clpP*) contain two introns of the intragenic region (Table 3). The size of the intron-

**Table 2. Genes present in the *A. venetum* chloroplast genome.**

| Category for genes                          | Group of genes                                        | Name of genes                                                                                                                                                                                                                                                                                              |
|---------------------------------------------|-------------------------------------------------------|------------------------------------------------------------------------------------------------------------------------------------------------------------------------------------------------------------------------------------------------------------------------------------------------------------|
| Transcription and translation-related genes | transfer RNAs                                         | trnM-CAU, trnR-ACG, trnY-GUA, trnG-UCC, trnL-UAG, trnI-GAU, trnW-CCA, trnR-UCU, trnQ-UUG, trnL-UAA, trnS-GGA, trnH-GUG, trnT-GGU, trnT-UGU, trnP-UGG, trnK-UUU, trnN-GUU, trnG-GCC, trnI-CAU, trnD-GUC, trnF-GAA, trnS-GCU, trnS-UGA, trnM-CAU, trnE-UUC, trnV-GAC, trnA-UGC, trnV-UAC, trnL-CAA, trnC-GCA |
|                                             | RNA polymerase                                        | rpoB, rpoA, rpoC1, rpoC2                                                                                                                                                                                                                                                                                   |
|                                             | ribosomal proteins(SSU)                               | rps8, rps4, rps16, rps14, rps7, rps12, rps2, rps11, rps19-fragment, rps19, rps18, rps3, rps15                                                                                                                                                                                                              |
|                                             | ribosomal proteins(LSU)                               | rpl2, rpl23, rpl32, rpl33, rpl36, rpl14, rpl16, rpl22, rpl20                                                                                                                                                                                                                                               |
|                                             | Translational initiation factor                       | infA                                                                                                                                                                                                                                                                                                       |
|                                             | ribosomal RNAs                                        | rrn4.5, rrn5, rrn23, rrn16                                                                                                                                                                                                                                                                                 |
| Photosynthesis-related genes                | NADH dehydrogenase                                    | ndhA, ndhH, ndhF, ndhJ, ndhE, ndhI, ndhG, ndhK, ndhC, ndhD, ndhB                                                                                                                                                                                                                                           |
|                                             | photosystem I                                         | psaI, psaJ, psaC, psbA, psbA                                                                                                                                                                                                                                                                               |
|                                             | photosystem II                                        | psbA, psbL, psbF, psbB, psbK, psbJ, psbM, psbT, psbE, psbD, psbC, psbH, psbI, psbN, psbZ                                                                                                                                                                                                                   |
|                                             | cytochrome b/f complex                                | petL, petN, petB, petG, petA, petD                                                                                                                                                                                                                                                                         |
|                                             | RubisCO                                               | rbcl                                                                                                                                                                                                                                                                                                       |
|                                             | ATP synthase                                          | atpA, atpE, atpH, atpI, atpB, atpF                                                                                                                                                                                                                                                                         |
| Other genes                                 | hypothetical chloroplast reading frames( <i>ycf</i> ) | <i>ycf2</i> , <i>ycf4</i> , <i>ycf1</i> , <i>ycf3</i> , <i>ycf1</i> -fragment                                                                                                                                                                                                                              |
|                                             | Maturase                                              | matK                                                                                                                                                                                                                                                                                                       |
|                                             | Protease                                              | clpP                                                                                                                                                                                                                                                                                                       |
|                                             | Envelope membrane protein                             | cemA                                                                                                                                                                                                                                                                                                       |
|                                             | Subunit of Acetyl-CoA carboxylase                     | accD                                                                                                                                                                                                                                                                                                       |
| C-type cytochrome synthesis gene            | ccsA                                                  |                                                                                                                                                                                                                                                                                                            |

<https://doi.org/10.1371/journal.pone.0261710.t002>



**Table 3. Length of exons and introns in genes with introns in the *A. venetum* chloroplast genome.**

| Gene     | Location | Exon I (bp) | Intron I (bp) | Exon II (bp) | Intron II (bp) | Exon III (bp) |
|----------|----------|-------------|---------------|--------------|----------------|---------------|
| trnK-UUU | LSC      | 35          | 2474          | 37           |                |               |
| rps16    | LSC      | 226         | 837           | 41           |                |               |
| trnG-UCC | LSC      | 23          | 672           | 48           |                |               |
| atpF     | LSC      | 411         | 706           | 144          |                |               |
| rpoC1    | LSC      | 1599        | 748           | 451          |                |               |
| ycf3     | SSC      | 155         | 794           | 226          | 717            | 126           |
| trnV-UAC | LSC      | 37          | 588           | 36           |                |               |
| rps12    | LSC      | 114         | 536           | 234          |                |               |
| clpP     | LSC      | 228         | 642           | 291          | 763            | 69            |
| rpl2     | IR       | 434         | 649           | 391          |                |               |
| ndhB     | IR       | 756         | 685           | 777          |                |               |
| trnI-GAU | IR       | 37          | 952           | 35           |                |               |
| trnA-UGC | IR       | 38          | 817           | 35           |                |               |
| ndhA     | SSC      | 545         | 1039          | 553          |                |               |

<https://doi.org/10.1371/journal.pone.0261710.t003>

containing matK gene in the trnK-UUU gene was 2,474 bp. The Rps12 gene is a trans-splicing gene with the 5' end in the LSC region and the 3' end in the IR region.

### Comparative analysis of genomic structure

Comparative genome analysis permits the examination of how DNA sequences diverge among related species. The whole cp genome sequence of *A. venetum* was compared to the sequences of *N. attenuata*, *G. hirsutum*, and *A. thaliana*. The identities of the entire sequence of the four cp genomes were drawn using the annotation mVISTA *N. attenuata* as a reference (Fig 2). The variation of the LSC and SSC regions were significantly greater than that of the IR regions. Moreover, the coding regions were more conserved than the non-coding regions. The most divergent coding regions of the four cp genomes were rnH-psbA, psbM-petN, trnC-GCA-petN, trnE-UUC-rpoB, trnY-GUA-trnE-UUC, trnV-UAC-ndhC, rbcL-accD, accD-psaI, LSC rpl32-trnL-UAG, and ndhI-ndhG ycf1-rps15 SSC, and the distribution of plastid rRNAs (rrn4.5, rrn5, rrn16, and rrn23) was the most conserved.

### Repeat sequence analysis

We studied the type, existence, and distribution of SSR in the cp genome of *A. venetum*. A total of 273 SSRs were found in *A. venetum*, most of which were distributed in LSC and SSC, and some in IR. These included 105 single nucleotide SSRs (38.46%), 142 dinucleotide SSRs (50.01%), 10 trinucleotides, 14 tetranucleotides, and two pentanucleotide repeats. The mononucleotide A and T repeat units accounted for the largest portion.

### Phylogenetic analysis

The cpDNA gene content is highly conserved in most land plants. We downloaded 21 complete cp genome sequences from the NCBI Organelle Genome Resources database to reveal the phylogenetic location of *A. venetum* (Fig 3). In this study, we constructed a phylogenetic tree to infer the phylogenetic positions of *A. venetum* cp genomes. The evolutionary tree was separated into four clusters. The phylogenetic tree showed that *Vitis vinifera* were clustered on a single terminal branch. Phylogeny analysis showed that *Glycine max*, *Ricinus communis*, *Populus trichocarpa*, *Prunus persica*, *Medicago truncatuta*, *Capsella rubella*, *A. thaliana*, and

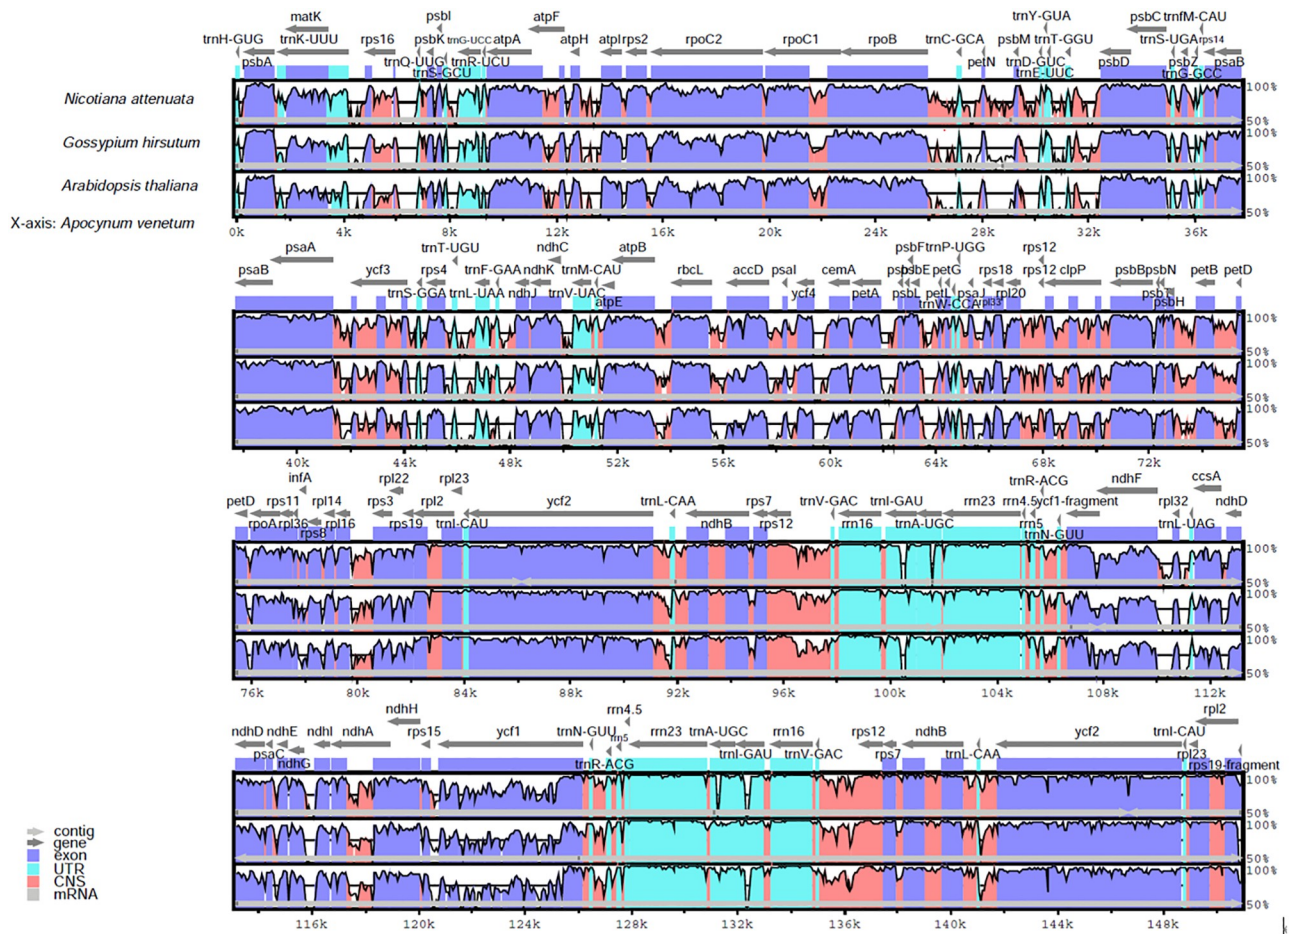

**Fig 2. Comparison of the cp genome sequences of four plants.** Comparison of the cp genome sequences of *N attenuata*, *G. hirsutum*, *A. thaliana*, and *A. venetum* generated with mVISTA. Gray arrows indicate the position and direction of each gene. Red and blue areas indicate the intergenic and genic regions, respectively. The vertical scale indicates the percentage of identity, ranging from 50% to 100%.

<https://doi.org/10.1371/journal.pone.0261710.g002>

*Eutrema salsgineum* formed an independent branch. We found that *A. venetum* L. was grouped into a terminal branch with *Lonicra japonica* and *N. attenuata*, *Capsicum annuum*, *Solanum tuberosum*, *Solanum lycopersicum* and *Salicornia europaea*. Meanwhile, *Nelumbo nucifera*, *Poenix dactylifera*, *Zea mays*, *Triticum aestivum*, and *Hordeum vulgare* were clustered on a branch.

### Discussion

In this study, we assembled, annotated and analyzed the complete cp sequence of *A. venetum*. We then analyzed its features, GC content, gene structure, and repeat sequences. The complete cp genome of *A. venetum* has a total length of 150,878 bp, with a pair of IRs of 25,810 bp that separate an LSC region of 81,951 bp and an SSC region of 17,307 bp. The DNA GC content of LSC, SSC, IR, and the whole genome were 36.49%, 32.41%, 43.3%, and 38.36%, respectively, which were similar to those of other species in *Nerium*. DNA GC content is an important index to evaluate the genetic relationship of *Nerium oleracea*, and the cpDNA GC content of *Nerium indicum* is similar to that in other species of *Apocynaceae* [58–63]. The content of DNA GC in the IR region is higher than that in other regions (LSC, SSC); this phenomenon is

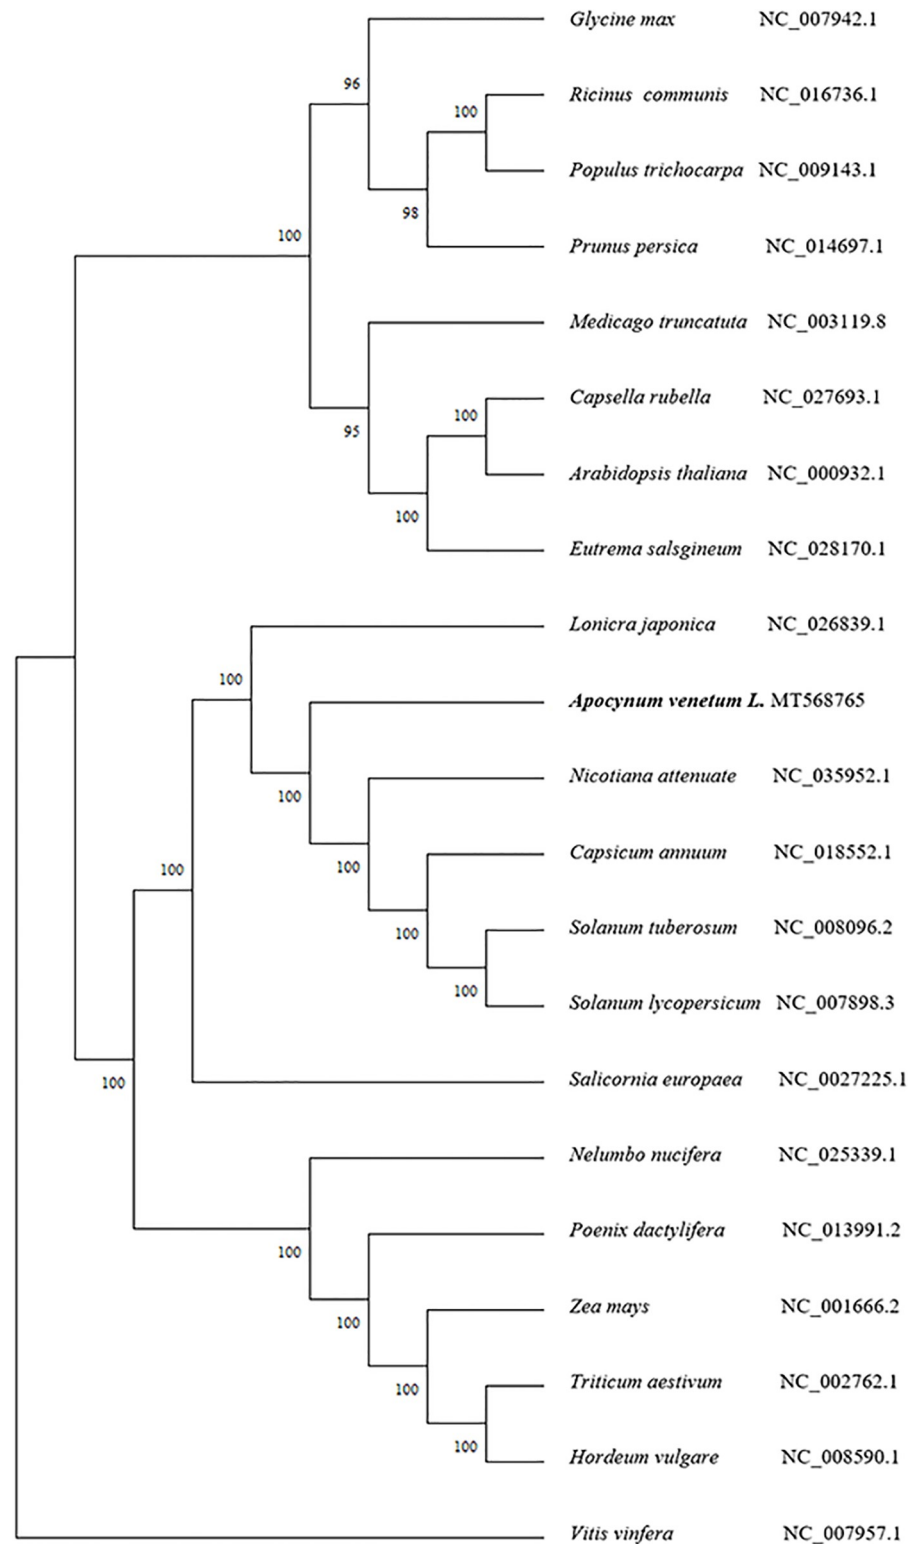

**Fig 3. Phylogenetic tree analysis of whole chloroplast genome.** Maximum likelihood (ML) phylogenetic tree reconstruction including 21 species based on all chloroplast genomes. The bootstrap value, based on 1,000 replicates, is shown on each node. *V. vinifera* was used as the outgroup. The GenBank accession numbers are listed following the species name.

<https://doi.org/10.1371/journal.pone.0261710.g003>



common in other plants [64–66]. The relatively high DNA GC content in the IR region was mainly attributed to the rRNA gene and the tRNA gene [67, 68].

Cp sequences have been used to compare the genetics of plant species, gene flow between species, and the size of ancestral populations of sister species [69]. Therefore, it is necessary to understand cp differences among species. We observed the order of approximately the same genes and the coding regions in the organization of the cp genome (Fig 2). The cp genome is considered to be highly conservative compared to the non-coding region, and the two infrared regions are less divergent than the LSC and SSC regions. The four cp genomes with the most different coding regions (rnH-psbA, psbM-petN, trnC-GCA-petN, trnE-UUC-rpoB, trnY--GUA-trnE-UUC, trnV-UAC-ndhC, rbcL-accD, accD-psaI, LSC rpl32-trnL-UAG, and ndhI-ndhG ycf1-rps15 SSC) and the four ribosomal RNA genes (rrn4.5, rrn5, rrn16, and rrn23) were the most conserved. Similar results have been observed in other plant cp genomes.

**Table 4. Codon-anticodon recognition patterns and codon usage of the *A. venetum* chloroplast genome.**

| Amino Acid | Codon | Number | RSCU* | tRNA     | Amino Acid | Codon | Number | RSCU* | tRNA     |
|------------|-------|--------|-------|----------|------------|-------|--------|-------|----------|
| Stop       | UAA   | 23     | 1.53  |          | Met        | AUG   | 401    | 1     | trnM-CAU |
| Stop       | UAG   | 9      | 0.6   |          | Asn        | AAU   | 627    | 1.56  |          |
| Stop       | UGA   | 13     | 0.87  |          | Asn        | AAC   | 178    | 0.44  |          |
| Ala        | GCU   | 459    | 1.78  |          | Pro        | CCU   | 270    | 1.49  |          |
| Ala        | GCC   | 174    | 0.67  |          | Pro        | CCC   | 153    | 0.84  |          |
| Ala        | GCA   | 281    | 1.09  |          | Pro        | CCA   | 191    | 1.05  | trnP-UGG |
| Ala        | GCG   | 118    | 0.46  |          | Pro        | CCG   | 111    | 0.61  |          |
| Cys        | UGU   | 128    | 1.44  |          | Gln        | CAA   | 495    | 1.54  | trnQ-UUG |
| Cys        | UGC   | 50     | 0.56  | trnC-GCA | Gln        | CAG   | 148    | 0.46  |          |
| Asp        | GAU   | 578    | 1.59  |          | Arg        | CGU   | 227    | 1.32  | trnR-ACG |
| Asp        | GAC   | 147    | 0.41  | trnD-GUC | Arg        | CGC   | 78     | 0.45  |          |
| Glu        | GAA   | 682    | 1.51  | trnE-UUC | Arg        | CGA   | 240    | 1.39  |          |
| Glu        | GAG   | 220    | 0.49  |          | Arg        | CGG   | 90     | 0.52  |          |
| Phe        | UUU   | 611    | 1.28  |          | Arg        | AGA   | 285    | 1.65  | trnR-UCU |
| Phe        | UUC   | 343    | 0.72  | trnF-GAA | Arg        | AGG   | 115    | 0.67  |          |
| Gly        | GGU   | 412    | 1.28  |          | Ser        | UCU   | 366    | 1.67  |          |
| Gly        | GGC   | 144    | 0.45  | trnG-GCC | Ser        | UCC   | 223    | 1.02  | trnS-GGA |
| Gly        | GGA   | 474    | 1.48  |          | Ser        | UCA   | 246    | 1.12  | trnS-UGA |
| Gly        | GGG   | 253    | 0.79  |          | Ser        | UCG   | 131    | 0.6   |          |
| His        | CAU   | 315    | 1.45  |          | Ser        | AGU   | 269    | 1.23  |          |
| His        | CAC   | 120    | 0.55  | trnH-GUG | Ser        | AGC   | 81     | 0.37  | trnS-GCU |
| Ile        | AUU   | 722    | 1.5   |          | Thr        | ACU   | 353    | 1.63  |          |
| Ile        | AUC   | 294    | 0.61  | trnI-CAU | Thr        | ACC   | 176    | 0.81  | trnT-GGU |
| Ile        | AUA   | 431    | 0.89  |          | Thr        | ACA   | 238    | 1.1   | trnT-UGU |
| Lys        | AAA   | 594    | 1.49  |          | Thr        | ACG   | 98     | 0.45  |          |
| Lys        | AAG   | 204    | 0.51  |          | Val        | GUU   | 361    | 1.49  |          |
| Leu        | UUA   | 597    | 1.97  |          | Val        | GUC   | 114    | 0.47  | trnV-GAC |
| Leu        | UUG   | 365    | 1.21  | trnL-CAA | Val        | GUA   | 360    | 1.48  |          |
| Leu        | CUU   | 388    | 1.28  |          | Val        | GUG   | 135    | 0.56  |          |
| Leu        | CUC   | 107    | 0.35  |          | Trp        | UGG   | 319    | 1     | trnW-CCA |
| Leu        | CUA   | 225    | 0.74  |          | Tyr        | UAU   | 512    | 1.64  |          |
| Leu        | CUG   | 132    | 0.44  |          | Tyr        | UAC   | 114    | 0.36  | trnY-GUA |

RSCU \*: relative synonymous codon usage.

<https://doi.org/10.1371/journal.pone.0261710.t004>

Cp genomes are highly conserved and contain a large amount of genetic information. The noncoding regions are less conserved than the coding regions [70, 71]. The genes *trnK-UUU*, *rps16*, *trnG-UCC*, *atpF*, *rpoC1*, *trnV-UAC*, *rps12*, *rpl2*, *ndhB*, *trnI-GAU*, *trnA-UGC*, and *ndhA* have one intron each, while *clpP* and *ycf3* contain two introns. A trans-splicing event was also observed in the *rps12* gene (Table 4). Previous studies have reported that *ycf3* is necessary for the stable accumulation of photosystem I complexes [42, 72]. Therefore, we believe that the intron gain in *ycf3* of *A. venetum* provides insight into the evolution of photosynthesis. As cp-specific SSRs are inherited from one parent and are mainly formed by the chain mismatch caused by the sliding of polymerase during DNA replication, they are often used in population genetics, species identification, and evolutionary process research on wild plants. In addition, the cp genome sequence is highly conserved, and SSR primers of cp genome can be transferred across species and genera. There were 273 SSRs detected in the CP genome of *A. venetum*. Among these SSRs, mono-, di-, tri-, tetra-, and pentanucleotide were detected. The average density of SSRs was 1.809 SSR/kb in *A. venetum* (A/T as the main component). These cpSSR markers could be used for future studies of the genetic structure, diversity, and differentiation of *A. venetum* and its related species.

The phylogenetic positions of 21 cp genomes were successfully analyzed with the support of full bootstrap at almost all nodes. A phylogenetic tree was constructed for the data by ML, and *V. vinifera* was used as an outgroup. In this method, an initial tree is first built using a fast but suboptimal method such as the neighbor-joining method, and its branch lengths are adjusted to maximize the likelihood of the data set for that tree topology under the desired model of evolution. The results show that *A. venetum* has the closest relationship with *L. japonica*, *N. attenuata*, *C. annuum*, *S. tuberosum*, and *S. lycopersicum*.

## Conclusion

We analyzed and illustrated the complete cp genome of *A. venetum*. The cp genome is conservative and similar to other species of *Apocynum*. These results provide a reference for the complete assembly of the cp genome of *Apocynaceae*, which may aid future breeding and research efforts. It may also assist in the development of unique *Apocynaceae* DNA barcodes of *Apocynaceae* and in determining the evolutionary history of *Apocynaceae*.

## Supporting information

### S1 File.

(ZIP)

### S2 File.

(RAR)

### S3 File.

(ZIP)

## Acknowledgments

We thank LetPub ([www.letpub.com](http://www.letpub.com)) for its linguistic assistance during the preparation of manuscript.

## Author Contributions

**Conceptualization:** Xiaonong Guo, Zhuania Wang.

**Data curation:** Xiaonong Guo, Deyu Cai, Lei Song, Jialin Bai.

**Formal analysis:** Xiaonong Guo.

**Funding acquisition:** Xiaonong Guo.

**Methodology:** Xiaonong Guo.

**Project administration:** Xiaonong Guo.

**Resources:** Xiaonong Guo.

**Software:** Xiaonong Guo, Zhuaxia Wang, Deyu Cai.

**Writing – original draft:** Xiaonong Guo, Zhuaxia Wang, Deyu Cai, Lei Song, Jialin Bai.

**Writing – review & editing:** Xiaonong Guo.

## References

1. Chen M, Zhao X-y, Zuo X-a. Comparative reproductive biology of *Apocynum venetum* L. in wild and managed populations in the arid region of NW China. *Plant Syst Evol.* 2015; 301(6): 1735–45. <https://doi.org/10.1007/S00606-014-1192-8>
2. Dong Z-J. A new advanced textile fiber plant in China-*Apocynum*. *Chin. Sci. Bull.* 1957; 19: 607–8.
3. Peng X-M, Zhang W-M, Wang M-L, Lu C-M, Gu G-P. Molecular Identification of *Apocynum venetum* and its Confusable Species. *Bull Bot Res.* 2007; (03): 302–307.
4. Su Q, Qiu L-Y. Study on the genetic diversity of *Apocynum* in Xinjiang based on RAPD technique. *J Agric Catastrophol.* 2015; 5(07): 1–17.
5. Xie W, Zhang X, Wang T, Hu J. Botany, traditional uses, phytochemistry and pharmacology of *Apocynum venetum* L. (Luobuma): A review. *J Ethnopharmacol.* 2012; 141(1): 1–8. <https://doi.org/10.1016/j.jep.2012.02.003> PMID: 22421379
6. Kim DW, Yokozawa T, Hattori M, Kadota S, Namba T. Inhibitory effects of an aqueous extract of *Apocynum venetum* leaves and its constituents on Cu<sup>2+</sup>-induced oxidative modification of low density lipoprotein. *Phytother Res.* 2000; 14(7): 501–504.
7. Yokozawa T, Nakagawa T. Inhibitory effects of Luobuma tea and its components against glucose-mediated protein damage. *Food Chem. Toxicol.* 2004; 42(6): 975–81. <https://doi.org/10.1016/j.fct.2004.02.010> PMID: 15110107
8. Kim D-W, Yokozawa T, Hattori M, Kadota S, Namba T. Effects of aqueous extracts of *Apocynum venetum* leaves on spontaneously hypertensive, renal hypertensive and NaCl-fed-hypertensive rats. *J Ethnopharmacol.* 2000; 72(1): 53–59. [https://doi.org/10.1016/S0378-8741\(00\)00197-5](https://doi.org/10.1016/S0378-8741(00)00197-5) PMID: 10967454
9. Irie K, Sato T, Tanaka I, Nakajima J-i, Kawaguchi M, Himi T. Cardiotoxic effect of *Apocynum venetum* L. extracts on isolated guinea pig atrium. *J Nat Med.* 2009; 63(2): 111–116. <https://doi.org/10.1007/s11418-008-0296-2> PMID: 19002560
10. Xiong Q, Fan W, Tezuka Y, Adnyana IK, Stampoulis P, Hattori M, et al. Hepatoprotective effect of *Apocynum venetum* and its active constituents. *Planta Med.* 2000; 66(2): 127–133. <https://doi.org/10.1055/s-2000-11135> PMID: 10763585
11. Yang X-B, Wu X-Q, Yang J-R, Huang Z-M, Chen H-Y, Cao W-B, et al. Hepatoprotective effect of *Apocynum venetum* L extract on fatty liver disease of 2K1C rats with high-fat and refined-carbohydrate diet. *World Chin. J. Digestol.* 2009; 17(2). <https://doi.org/10.11569/WCJD.V17.I2.135>
12. Chan C-O, Lau C-C, Ng Y-F, Xu L-J, Chen S-B, Chan S-W, et al. Discrimination between Leave of *Apocynum venetum* and Its Adulterant, *A. pictum* Based on Antioxidant Assay and Chemical Profiles Combined with Multivariate Statistical Analysis. *Antioxidants.* 2015; 4(2): 359–372. <https://doi.org/10.3390/antiox4020359> PMID: 26783710
13. Yokozawa T, Kashiwada Y, Hattori M, Chung HY. Study on the components of luobuma with peroxynitrite-scavenging activity. *Biol Pharm Bull.* 2002; 25(6): 748–52. <https://doi.org/10.1248/bpb.25.748> PMID: 12081141
14. Liang T, Yue W, Li Q. Comparison of the Phenolic Content and Antioxidant Activities of *Apocynum venetum* L. (Luo-Bu-Ma) and Two of Its Alternative Species. *IJMS.* 2010; 11(11): 4452–4464. <https://doi.org/10.3390/ijms11114452> PMID: 21151449
15. Butterweck V, Nishibe S, Sasaki T, Uchida M. Antidepressant Effects of *Apocynum venetum* Leaves in a Forced Swimming Test. *Biol Pharm Bull.* 2001; 24(7): 848–851. <https://doi.org/10.1248/bpb.24.848> PMID: 11456130

16. Grundmann O, Nakajima J-I, Kamata K, Seo S, Butterweck V. Kaempferol from the leaves of *Apocynum venetum* possesses anxiolytic activities in the elevated plus maze test in mice. *Phytomedicine*. 2009; 16(4): 295–302. <https://doi.org/10.1016/j.phymed.2008.12.020> PMID: 19303276
17. Butterweck V, Simbrey K, Seo S, Sasaki T, Nishibe S. Long-term effects of an *Apocynum venetum* extract on brain monoamine levels and  $\beta$ -AR density in rats. *Pharmacol Biochem Behav*. 2003; 75(3): 557–64. [https://doi.org/10.1016/s0091-3057\(03\)00118-7](https://doi.org/10.1016/s0091-3057(03)00118-7) PMID: 12895673
18. Grundmann O, Nakajima J-I, Seo S, Butterweck V. Anti-anxiety effects of *Apocynum venetum* L. in the elevated plus maze test. *J Ethnopharmacol*. 2007; 110(3): 406–11. <https://doi.org/10.1016/j.jep.2006.09.035> PMID: 17101250
19. Fan W, Tezuka Y, Xiong Q, Hattori M, Namba T, Kadota S. Apocynins A-D: New Phenylpropanoid-substituted Flavan-3-ols Isolated from Leaves of *Apocynum venetum* (Luobuma-Ye). *Chem Pharm Bull*. 1999; 47(7): 1049–50. <https://doi.org/10.1248/CPB.47.1049>
20. Murakami T, Kishi A, Matsuda H, Hattori M, Yoshikawa M. Medicinal foodstuffs. XXIV. Chemical constituents of the processed leaves of *Apocynum venetum* L.: absolute stereostructures of apocynosides I and II. *Chem Pharm Bull*. 2001; 49(7): 845–8. <https://doi.org/10.1248/cpb.49.845> PMID: 11456089
21. Kobayashi M, Saitoh H, Seo S, Butterweck V, Nishibe S. *Apocynum venetum* extract does not induce CYP3A and P-glycoprotein in rats. *Biol Pharm Bull*. 2004; 27(10):1649–52. <https://doi.org/10.1248/bpb.27.1649> PMID: 15467212
22. Kwan C-Y, Zhang W-B, Nishibe S, Seo S. A novel in vitro endothelium-dependent vascular relaxant effect of *Apocynum venetum* leaf extract. *Clin Exp Pharmacol Physiol*. 2005; 32(9): 789–795. <https://doi.org/10.1111/j.1440-1681.2005.04255.x> PMID: 16173937
23. Kuo C-S, Kwan C-Y, Gong C-L, Tsai M-F, Nishibe S, Tatsuzaki J, et al. *Apocynum venetum* leaf aqueous extract inhibits voltage-gated sodium channels of mouse neuroblastoma N2A cells. *J Ethnopharmacol*. 2011; 136(1): 149–55. <https://doi.org/10.1016/j.jep.2011.04.035> PMID: 21530630
24. Xu Z-C, Zhou J-H, Zhang C-S, Li Y-Q. Review of Current Research and Utilization Status of *Apocynum venetum* Germplasm in China. 2018, 53 (3): 382–390.
25. Xu Z, Zhou J, Ren T, Du H, Liu H, Li Y, et al. Salt stress decreases seedling growth and development but increases quercetin and kaempferol content in *Apocynum venetum*. *Plant Biology*. 2020; 22(5): 813–821. <https://doi.org/10.1111/plb.13128> PMID: 32378758
26. Bai L, Luo MB, Chuan LC, Wang SL, Amina. Short report on planting techniques of *Apocynum venetum*. *Chin Wild Plant Resour*. 2005; 24: 65–68.
27. Chen M, Zhao X-Y, Zuo X-A, Lian J. Comparative pollination biology of *Apocynum venetum* at different desert landscapes. *J Desert Res*. 2016; (1): 124–30.
28. Wang DQ, Li GQ, Wang L. Daily dynamics of photosynthesis and water physiological characteristics of *Apocynum venetum* and *A.cannabinum* under drought stress. *Acta Botan. Bor. Sin*. 2012; 32: 1198–1205.
29. Liu ZH, Yu Z, Dong P, Zhou YX, Li XL. Genetic Diversity of *Apocynum venetum* Based on ISSR. *Chin J Grassland*. 2009; 31: 96–101.
30. Yuan N, Li M, Jia C. De novo transcriptome assembly and population genetic analyses of an important coastal shrub, *Apocynum venetum* L. *BMC Plant Biology*. 2020; 20(1): 1–15. <https://doi.org/10.1186/s12870-019-2170-7> PMID: 31898482
31. Brunkard JO, Runkel AM, Zambryski PC. Chloroplasts extend stromules independently and in response to internal redox signals. *Proc Natl Acad Sci. USA*. 2015; 112(32): 10044–9. <https://doi.org/10.1073/pnas.1511570112> PMID: 26150490
32. Lilly JW, Havey MJ, Jackson SA, Jiang J. Cytogenomic Analyses Reveal the Structural Plasticity of the Chloroplast Genome in Higher Plants. *Plant Cell*. 2001; 13(2): 245–254. <https://doi.org/10.1105/tpc.13.2.245> PMID: 11226183
33. Wang W, Lanfear R. Long-Reads Reveal That the Chloroplast Genome Exists in Two Distinct Versions in Most Plants. *Genome Biol Evol*. 2019; 11(12): 3372–3381. <https://doi.org/10.1093/gbe/evz256> PMID: 31750905
34. Amiroufsefi A, Hyvönen JT, Poczai P. The chloroplast genome sequence of bittersweet (*Solanum dulcamara*): Plastid genome structure evolution in Solanaceae. *PLoS ONE*. 2018; 13(4). 1–23. <https://doi.org/10.1371/journal.pone.0196069> PMID: 29694416
35. Dong W, Xu C, Li C, Sun J, Zuo Y, Shi S, et al. ycf1, the most promising plastid DNA barcode of land plants. *Sci Rep*. 2015; 5(1): 8348-. <https://doi.org/10.1038/srep08348> PMID: 25672218
36. Neubig KM, Whitten WM, Carlswald BS, Blanco MA, Endara L, Williams NH, et al. Phylogenetic utility of ycf1 in orchids: a plastid gene more variable than matK. *Plant Syst Evol*. 2009; 277(1): 75–84. <https://doi.org/10.1007/S00606-008-0105-0>

37. Hernández-León S, Gernandt DS, Rosa JAPdl, Jardón-Barbolla L. Phylogenetic relationships and species delimitation in pinus section trifoliae inferred from plastid DNA. *PLoS ONE*. 2013; 8(7). <https://doi.org/10.1371/journal.pone.0070501> PMID: 23936218
38. Lu C, Zhang W, Peng X, Gu G, Chen M, Tang Z. Development of randomly amplified polymorphic DNA-sequence characterized amplified region marker for identification of *Apocynum venetum* LINN. from *A. pictum* SCHRENK. *Biol Pharm Bull*. 2010; 33(3): 522–6. <https://doi.org/10.1248/bpb.33.522> PMID: 20190420
39. Jh Yuan, Cheng FY, Zhou SL. Hybrid Origin of *Paeonia* × *yananensis* Revealed by Microsatellite Markers, Chloroplast Gene Sequences, and Morphological Characteristics. *Int J Plant Sci*. 2010; 171(4): 409–20. <https://doi.org/10.1086/651228>
40. Zhao X, Zhou Z-Q, Lin Q-B, Pan K-Y, Li M-Y. Phylogenetic analysis of *Paeonia* sect. Moutan (*Paeoniaceae*) based on multiple DNA fragments and morphological data. *J Syst Evol*. 2007; 46(4): 563–572. <https://doi.org/10.3724/SP.J.1002.2008.06197>
41. Zhang J-M, Liu J, Sun H-L, Yu J, Wang J-X, Zhou S-L. Nuclear and chloroplast SSR markers in *Paeonia delavayi* (*Paeoniaceae*) and cross-species amplification in *P. ludlowii*. *Am J Bot*. 2011; 98(12): 346–348. <https://doi.org/10.3732/AJB.1100240> PMID: 22074777
42. Liu X, Chang E-M, Liu J-F, Huang Y-N, Wang Y, Yao N, et al. Complete Chloroplast Genome Sequence and Phylogenetic Analysis of *Quercus bawanglingensis* Huang, Li et Xing, a Vulnerable Oak Tree in China. *Forests*. 2019; 10, 587. <https://doi.org/10.3390/f10070587>
43. Dierckxsens N., Mardulyn P. and Smits G. NOVOPlasty: De novo assembly of organelle genomes from whole genome data. *Nucleic Acids Research*. 2016; <https://doi.org/10.1093/nar/gkw955> PMID: 28204566
44. Mayor C, Brudno M, Schwartz JR, Poliakov A, Rubin EM, Frazer KA, et al. VISTA: visualizing global DNA sequence alignments of arbitrary length. *Bioinformatics*. 2000; 16(11): 1046–1047. <https://doi.org/10.1093/bioinformatics/16.11.1046> PMID: 11159318
45. Frazer KA, Pachter L, Poliakov A, Rubin EM, Dubchak I. VISTA: computational tools for comparative genomics. *Nucleic Acids Res*. 2004; 32: 273–279. <https://doi.org/10.1093/nar/gkh458> PMID: 15215394
46. Kurtz S, Choudhuri JV, Ohlebusch E, Schleiermacher C, Stoye J, Giegerich R. REPuter: the manifold applications of repeat analysis on a genomic scale. *Nucleic Acids Res*. 2001; 29(22): 4633–4642. <https://doi.org/10.1093/nar/29.22.4633> PMID: 11713313
47. Chen P, Gao G, Yu C, Chen J, Chen K, Zhu A. Data set for transcriptome analysis of *Apocynum venetum* L. *Data Brief*. 2018; 20: 1739–1744. <https://doi.org/10.1016/j.dib.2018.08.207> PMID: 30271870
48. Li Q, Wan JM. SSR Hunter: development of a local searching software for SSR sites. *Yi Chuan*. 2005; 27: 808–810. PMID: 16257914
49. Gao G, Chen P, Chen J, Chen K, Wang X, Abubakar AS, et al. Genomic Survey, Transcriptome, and Metabolome Analysis of *Apocynum venetum* and *Apocynum hendersonii* to Reveal Major Flavonoid Biosynthesis Pathways. *Metabolites*. 2019; 9(12). <https://doi.org/10.3390/METABO9120296> PMID: 31817331
50. Xu J, Shen X, Liao B, Xu J, Hou D. Comparing and phylogenetic analysis chloroplast genome of three *Achyranthes* species. *Sci Rep*. 2020; 10(1): 10818. <https://doi.org/10.1038/s41598-020-67679-y> PMID: 32616875
51. Larkin MA, Blackshields G, Brown NP, Chenna R, McGettigan PA, McWilliam H, et al. Clustal W and Clustal X version 2.0. *Bioinformatics*. 2007; 23(21): 2947–8. <https://doi.org/10.1093/bioinformatics/btm404> PMID: 17846036
52. Plovanich M, Bogorad RL, Sancak Y, Kamer KJ, Strittmatter L, Li AA, et al. MICU2, a paralog of MICU1, resides within the mitochondrial uniporter complex to regulate calcium handling. *PLoS ONE*. 2013; 8(2): e55785. <https://doi.org/10.1371/journal.pone.0055785> PMID: 23409044
53. Liu H-Y, Yu Y, Deng Y-Q, Li J, Huang Z-X, Zhou S-D. The Chloroplast Genome of *Lilium henrici*: Genome Structure and Comparative Analysis. *Molecules*. 2018; 23(6): 1276. <https://doi.org/10.3390/molecules23061276> PMID: 29861452
54. Shen X, Guo S, Yin Y, Zhang J, Yin X, Liang C, et al. Complete Chloroplast Genome Sequence and Phylogenetic Analysis of *Aster tataricus*. *Molecules*. 2018; 23(10): 2426. <https://doi.org/10.3390/molecules23102426> PMID: 30248930
55. Li W, Liu Y, Yang Y, Xie X, Lu Y, Yang Z, et al. Interspecific chloroplast genome sequence diversity and genomic resources in *Diospyros*. *BMC Plant Biol*. 2018; 18(1): 210-. <https://doi.org/10.1186/s12870-018-1421-3> PMID: 30257644
56. Kumar S, Stecher G, Tamura K. MEGA7: Molecular Evolutionary Genetics Analysis Version 7.0 for Bigger Datasets. *Mol Biol Evol*. 2016; 33(7): 1870. <https://doi.org/10.1093/molbev/msw054> PMID: 27004904



57. Chang L, Yu X, Wang W, Tian X. The complete chloroplast genome of *Apocynum venetum* (Apocynaceae). *Mitochondrial DNA Part B*. 2020; 5: 2601–2602. <https://doi.org/10.1080/23802359.2020.1781567> PMID: 33457875
58. Wang D-L, Liu Y-Y, Tian D, Yu L-Y, Gui L-J. Characterization of the complete chloroplast genome of *Plumeria rubra* cv. *Acutifolia* (Apocynaceae). *Mitochondrial DNA Part B*. 2020; 5(1): 927–928. <https://doi.org/10.1080/23802359.2020.1721023> PMID: 33366813
59. Ali MA. Complete chloroplast genome of medicinally important poisonous shrub *Adenium obesum* (Forssk.) Roem. & Schult. (Apocynaceae). *Mitochondrial DNA Part B*. 2020; 5(1): 568–569. <https://doi.org/10.1080/23802359.2019.1710292> PMID: 33366650
60. Park S, Ruhlman TA, Sabir JSM, Mutwakil MHZ, Baeshen MN, Sabir MJ, et al. Complete sequences of organelle genomes from the medicinal plant *Rhazya stricta* (Apocynaceae) and contrasting patterns of mitochondrial genome evolution across asterids. *BMC Genomics*. 2014; 15(1): 405–. <https://doi.org/10.1186/1471-2164-15-405> PMID: 24884625
61. Oliveira EJD, Marques A, Almeida C. The chloroplast genome of *Hancornia speciosa* Gomes: structural organization and phylogenomic studies in Rauvolfioideae (Apocynaceae). *BRAZ J BOT*. 2019; 42(3): 449–455. <https://doi.org/10.1007/S40415-019-00549-8>
62. Guan M, Zhang R. The complete chloroplast genome of *Biondia insignis* Tsiang (Apocynaceae). *Mitochondrial DNA Part B*. 2019; 4(1): 280–281. <https://doi.org/10.1080/23802359.2018.1541722>
63. Jansen RK, Raubeson LA, Boore JL, dePamphilis CW, Chumley TW, Haberle RC, et al. Methods for Obtaining and Analyzing Whole Chloroplast Genome Sequences. *Methods Enzymol*. 2005; 395: 348–384. [https://doi.org/10.1016/S0076-6879\(05\)95020-9](https://doi.org/10.1016/S0076-6879(05)95020-9) PMID: 15865976
64. Shao X. Progress in Chloroplast Genome Analysis. progress in biochemistry and biophysics. 2008.
65. Zhou SL, Zou XH, Zhou ZQ, Liu J, Xu C, Yu J, et al. Multiple species of wild tree peonies gave rise to the ‘king of flowers’, *Paeonia suffruticosa* Andrews. *Proc. Biol. Sci*. 2014; 281(1797). <https://doi.org/10.1098/RSPB.2014.1687> PMID: 25377453
66. Shen X, Wu M, Liao B, Liu Z, Bai R, Xiao S, et al. Complete Chloroplast Genome Sequence and Phylogenetic Analysis of the Medicinal Plant *Artemisia annua*. *Molecules*. 2017; 22(8): 1330. <https://doi.org/10.3390/molecules22081330> PMID: 28800082
67. He Y, Xiao H, Deng C, Xiong L, Yang J, Peng C. The Complete Chloroplast Genome Sequences of the Medicinal Plant *Pogostemon cablin*. *Int J Mol Sci*. 2016; 17(6): 820. <https://doi.org/10.3390/ijms17060820> PMID: 27275817
68. Boudreau E, Takahashi Y, Lemieux C, Turmel M, Rochaix JD. The chloroplast *ycf3* and *ycf4* open reading frames of *Chlamydomonas reinhardtii* are required for the accumulation of the photosystem I complex. *EMBO J* 1997; 16(20): 6095–6104. <https://doi.org/10.1093/emboj/16.20.6095> PMID: 9321389
69. Li X, Li Y, Zang M, Li M, Fang Y. Complete Chloroplast Genome Sequence and Phylogenetic Analysis of *Quercus acutissima*. *Int J Mol Sci*. 2018; 19(8): 2443–2459. <https://doi.org/10.3390/ijms19082443> PMID: 30126202
70. Souza UJBd, Nunes R, Targueta CP, Diniz-Filho JAF, Telles MPdC. The complete chloroplast genome of *Stryphnodendron adstringens* (Leguminosae—Caesalpinioideae): comparative analysis with related Mimosoid species. *Sci Rep*. 2019; 9(1): 14206–14206. <https://doi.org/10.1038/s41598-019-50620-3> PMID: 31578450
71. Naver H, Boudreau E, Rochaix J-D. Functional Studies of *Ycf3*: Its Role in Assembly of Photosystem I and Interactions with Some of Its Subunits. the *Plant Cell*. 2001; 13(12): 2731–2745. <https://doi.org/10.1105/tpc.010253> PMID: 11752384
72. Guo XN, Wang YL, Wang SM. Complete chloroplast genome sequences from yellowhorn (*Xanthoceras sorbifolia*) and evolution analysis based on codon usage bias. *Intl J Agric Biol*. 2020; 24: 676–684.
